# Supplementary material
Source: Springer Nature journal article supplement (https://www.springermedizin.de/resource/supplementary/12936_2011_1798_MOESM5_ESM.pdf/9541804)

**A**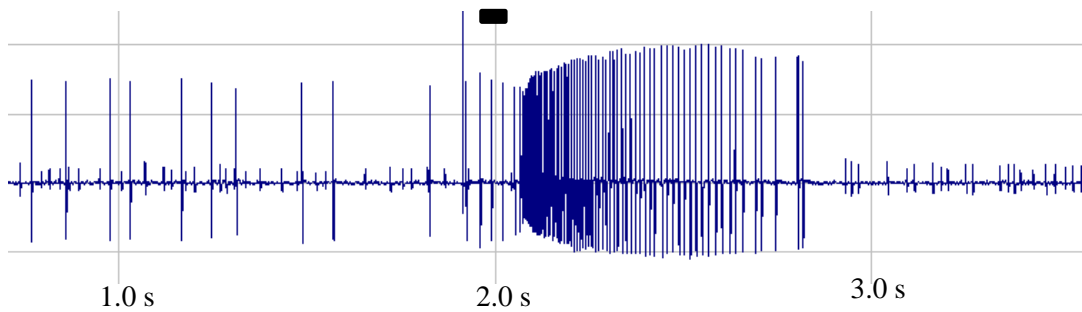**B**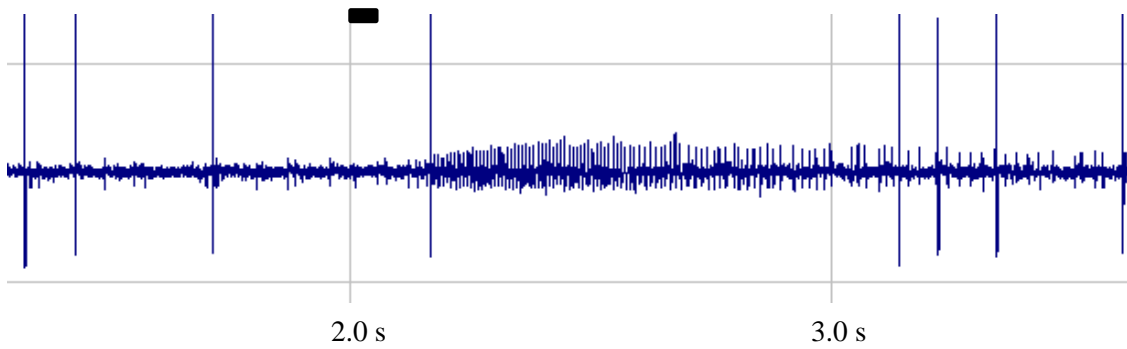**C**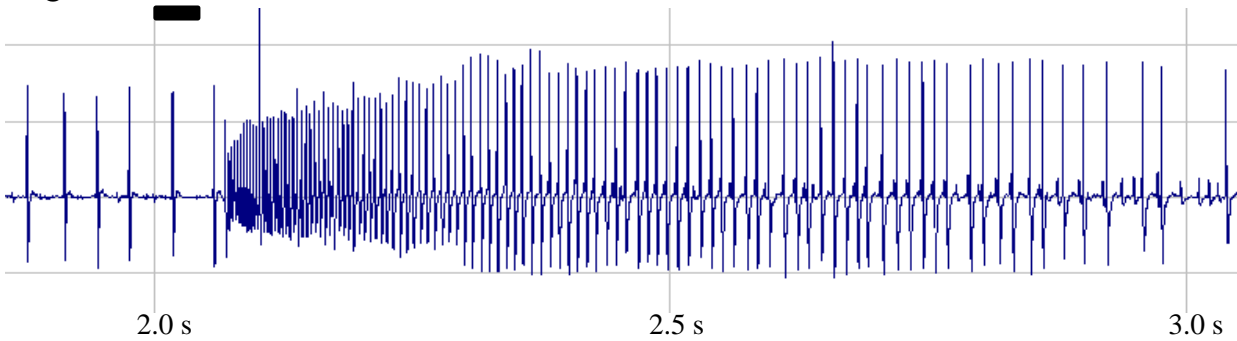

Supplement: MOESM5 [file 9541804]
